# Supplementary material for: Quantifiable diagnosis of muscular dystrophies and neurogenic atrophies through network analysis
Source: BMC Med. 2013 Mar 20;11:77. doi: 10.1186/1741-7015-11-77 (PMC3621542; doi:10.1186/1741-7015-11-77)
Supplement: Additional file 2: Table S1 — Muscle biopsies and images used in this study. Information about the age and type of muscle is provided. Control muscles have been grouped according to their location (quadriceps, biceps or gastrocnemius muscle) and age (child or adult). [file 1741-7015-11-77-S2.xls]

## Sheet: Sheet1
		Control Biceps
		Age	Muscle	Number of images
		18	Biceps	2	BC	011	012
		18	Biceps	1	BC	021
		65	Biceps	1	BC	031
		31	Biceps	1	BC	041
		28	Biceps	1	BC	051
		61	Biceps	2	BC	061	062
		29	Biceps	1	BC	071
		29	Biceps	1	BC	081
		22	Biceps	1	BC	091
		35	Biceps	1	BC	101
		22	Biceps	1	BC	111
		25	Biceps	1	BC	121
		26	Biceps	1	BC	131
		40	Biceps	1	BC	141
				16
		Control Quadriceps (adult)
		Age	Muscle	Number of images
		22	Quadriceps	1	QC	011
		40	Quadriceps	1	QC	021
		51	Quadriceps	2	QC	031	032
		57	Quadriceps	1	QC	041
		19	Quadriceps	1	QC	051
		59	Quadriceps	2	QC	061	062
		17	Quadriceps	2	QC	071	072
		38	Quadriceps	1	QC	081
		27	Quadriceps	1	QC	091
				12
		Control Quadriceps (children)
		Age	Muscle	Number of images
		7	Quadriceps	1	QC	511
		15	Quadriceps	1	QC	911
		7	Quadriceps	1	QC	521
		9	Quadriceps	1	QC	531
		7	Quadriceps	1	QC	541
		2	Quadriceps	1	QC	551
		13	Quadriceps	3	QC	921	922	923
		5	Quadriceps	1	QC	561
		6	Quadriceps	1	QC	571
		2	Quadriceps	3	QC	581	582	583
		4	Quadriceps	2	QC	591	592
		6	Quadriceps	2	QC	601	602
				18
		Control Gastrocnemius
		Age	Muscle	Number of images
		32	Gastrocnemius	1	GC	011
		48	Gastrocnemius	2	GC	021	022
		20	Gastrocnemius	1	GC	031
				4
		Muscular Dystrophies (children)
		Age	Muscle	Number of images
		6	Quadriceps	1	QD	511
		4	Quadriceps	2	QD	521	522
		2	Quadriceps	1	QD	531
		7	Quadriceps	2	QD	541	542
		5	Quadriceps	1	QD	551
		5	Quadriceps	1	QD	561
		2	Quadriceps	1	QD	571
		8	Quadriceps	2	QD	581	582
		8	Quadriceps	2	QD	591	592
		4	Quadriceps	2	QD	601	602
		4	Quadriceps	1	QD	611
		2	Quadriceps	2	QD	621	622
		2	Quadriceps	2	QD	631	632
				20
		Neurogenic Atrophies (adult)
		Age	Muscle	Number of images
		44	Bíceps	3	BNA	011	012	013
		52	Bíceps	1	BNA	021
		44	Biceps	2	BNA	031	032
		52	Biceps	2	BNA	041	042
		75	Bíceps	1	BNA	051
		44	Peroneus	3	PNA	011	012	013
		75	Peroneus	1	PNA	021
		40	Peroneus	1	PNA	031
		80	Quadriceps	2	QNA	011	012
		48	Tibialis	1	TNA	011
				17
		TEST
		Age	Muscle	Number of images
		55	Biceps	5	X	011	012	013	014	015
		37	Gastrocnemius	2	X	021	022
		12	Quadriceps	1	X	111
		6	Quadriceps	1	X	121
		45	Biceps	1	X	031
		3m	Quadriceps	1	X	131
		47	Gastrocnemius	2	X	041	042
		54	Gastrocnemius	1	X	051
		48	Biceps	1	X	061
				15
