# Supplementary material for: Quantifiable diagnosis of muscular dystrophies and neurogenic atrophies through network analysis
Source: BMC Med. 2013 Mar 20;11:77. doi: 10.1186/1741-7015-11-77 (PMC3621542; doi:10.1186/1741-7015-11-77)
Supplement: Additional file 4: Table S2 — List of 82 characteristics analyzed and their values for each image. Values for the 82 characteristics of the 87 images used for the training step and the 15 other images tested. Av. = Average, s. d. = standard deviation. Characteristics 1 to 24 mimic features that the pathologist evaluates when analyzing a biopsy. The 24 characteristics can be classified into four groups: geometrically related to the size of fibers (1 to 6), geometrically related to the shape and orientation of fibers (7 to 14), geometrically related to the collagen content (15 and 16), and network characteristics (17 to 24). The network features capture information about the organization of the fibers. Area: Size (in pixels) of the fiber (A2). Major Axis: Length (in pixels) of the major axis of the ellipse that has the same normalized second central moments as the fiber. Minor Axis: Length (in pixels) of the minor axis of the ellipse that has the same normalized second central moments as the fiber. Relation Axis: Ratio between the major and minor axes of each fiber. Convex Hull: Proportion of the pixels in the convex hull that are also in the fiber. Computed as area of fiber/area of the convex hull. The convex hull is the smallest convex polygon that can contain the fiber. Angles: Angle (in degrees) between the x-axis (horizontal to the image) and the major axis of the ellipse that has the same second-moments as the fiber. Relation A1/A2: Ratio between the size (in pixels) of the ‘expanded fiber’ (A1) and the size of the fiber (A2, in pixels). Neighbors: Number of neighbor fibers of a fiber. Characteristics 25 to 38 are related to the value for a geometric characteristic of a node and the average value of its neighbors. A short description is given for characteristics 39 to 82: Strength: Node strength is the sum of weights of links connected to the node, where the weight of links, in our case, is the distance in pixels between two fibers. Clustering coefficient: The fraction of triangles around a [file 1741-7015-11-77-S4.xls]

## Sheet: Sheet1
		CHARACTERISTICS		Control Biceps																CHARACTERISTICS		Control Quadriceps (adult)												CHARACTERISTICS		Control Quadriceps (children)
				1	2	3	4	5	6	7	8	9	10	11	12	13	14	15	16			1	2	3	4	5	6	7	8	9	10	11	12			1	2	3	4	5	6	7	8	9	10	11	12	13	14
		Number	Name	BC011	BC12	BC021	BC031	BC041	BC051	BC061	BC062	Bc071	BC081	BC091	BC101	BC111	BC121	BC131	BC141	Number	Name	QC011	QC021	QC031	QC032	QC041	QC051	QC061	QC062	QC071	QC072	QC081	QC091	Number	Name	QC511	QC911	QC521	QC531	QC541	QC551	QC921	QC922	QC923	QC561	QC571	QC581	QC582	QC583
		1	Average Area	8695.92	8529.37	12453.6	12897.4	23681.6	19043.9	18004.6	16519.2	34657.3	22329.7	13337.5	18231.3	19029.5	19692.2	29365.2	22042.2	1	Average Area	11205.2	14684	17084.8	17392.2	6770.08	12922.4	12706.5	17340.8	18500.1	21897.5	6915.13	25193.5	1	Average Area	2838.95	15589.5	4296.28	12887.3	3064.48	2927.71	11396.3	10625.7	10243.1	3218.99	5338.4	2141.53	1895.92	1835.97
		2	s. d. Area	3131.81	3084.57	5111.41	5972.21	11718.9	7740.8	8125.99	7072.2	15724	10095	5643.44	8458.82	9798.68	9848.56	14830.6	11909.6	2	s. d. Area	5389.58	8083.58	10164	10607	2904.91	4971.86	5357.46	10274.4	8148.06	8374.48	3532.45	9540.94	2	s. d. Area	1161.46	8009.22	1682.76	5878.83	1166.1	1161.36	4948.32	4736.05	4703.57	1541.81	2092.9	913.927	1194.37	806.958
		3	Average Area of slow cells	7883.6	7867.6	13138.5	11750.2	26755.1	19460.8	17148.7	14342.8	38287.3	21145.3	11973.8	18514.4	18930.7	16590.6	21537.2	18462.5	3	Average Area of slow cells	8930.61	13960.8	21814.4	22437.8	7693.03	12803	12348.8	19910.9	17021	18227.1	7150.11	23508.5	3	Average Area of slow cells	3446.02	14282.6	4839.41	11653.8	3420.13	3291.19	10815.8	9845.19	9894.08	4059.07	5029.37	1837.84	1677.42	1612.32
		4	s. d. Area of slow cells	2692.33	2686	5420.67	5982.82	11754.1	8260.14	6705.77	6374.17	15026.2	10143.4	5089.48	8501.68	10236.5	6870.3	10330.3	6494.17	4	s. d. Area of slow cells	2928.45	8021.57	11633.7	13086.2	3420.75	4501.61	4541.71	11570.3	6386.88	8480.82	2930.92	8532.71	4	s. d. Area of slow cells	1277.11	7668.22	1751.63	5292.7	1121.66	1141.19	4687.07	4078.28	5109.61	1243.18	2199.75	522.356	602.051	485.834
		5	Average Area of fast cells	10979.4	10641.3	10495.6	14815.5	17181.9	17589.7	18747.1	18585.2	23427.2	27160.6	15183.8	17539.9	19553.4	22375.2	32803.6	24059.4	5	Average Area of fast cells	11405	14985.6	14373.8	14164.4	6219.55	12949.6	12785.9	16267.6	19093.4	23732.7	6820.52	27829.6	5	Average Area of fast cells	2509.22	16617.5	3858.28	14083.4	2932.51	2487.88	12056.9	11552.1	10593.7	2479.61	5566.24	2435.98	2095.16	2055.09
		6	s. d. Area of fast cells	3161.15	3327.64	3437.61	5460.35	8637.12	5392.65	9142.25	7103.44	12279.6	8410.84	5847.09	8373.41	7129.61	11186.9	15233.4	13689.5	6	s. d. Area of fast cells	5511.73	8109.17	8085.09	6992.34	2388.18	5080.32	5526.13	9512.29	8701.31	7718.16	3746.28	10470	6	s. d. Area of fast cells	942.409	8143.96	1488.58	6180.26	1155.25	1026.32	5164.23	5277.41	4240.07	1394.01	1982.27	1097.87	1521.49	980.585
		7	Average major Axis	129.36	127.399	156.02	161.161	217.515	220.951	204.297	190.591	251.796	202.597	163.783	188.73	190.695	232.105	235.229	208.086	7	Average major Axis	153.126	179.123	185.697	204.837	129.792	168.984	161.853	197.679	203.978	208.832	120.841	223.769	7	Average major Axis	74.8351	171.98	88.3803	146.974	79.4757	73.3625	154.977	147.997	147.706	80.6003	101.372	62.7914	60.8155	59.2956
		8	Average minor Axis	85.746	85.3668	99.9539	100.558	133.698	110.998	112.313	111.741	171.616	135.883	103.586	120.064	122.084	107.808	151.135	127.605	8	Average minor Axis	91.6761	102.257	112.232	103.252	66.9192	99.4261	100.165	105.745	115.173	133.969	72.48	145.335	8	Average minor Axis	48.1448	112.218	62.1182	106.32	49.7365	50.6283	92.2845	89.9848	88.2065	49.8286	67.086	43.6505	39.2599	39.53
		9	Average Relation Axis	1.68534	1.63716	1.79657	1.77408	1.86504	2.25412	1.97168	1.89583	1.67521	1.68302	1.72634	1.77211	1.85091	2.31162	1.75225	1.89248	9	Average Relation Axis	1.86274	1.94627	1.89854	2.27823	2.10725	1.84064	1.82758	2.13532	1.95744	1.70625	1.79715	1.76538	9	Average Relation Axis	1.65396	1.74046	1.56752	1.56088	1.71032	1.56487	1.86777	1.81006	1.82385	1.71155	1.66201	1.50083	1.62879	1.55618
		10	s. d. Relation Axis	0.842324	0.714783	1.04451	0.755309	1.07787	1.15959	0.801175	1.03689	1.0893	0.78345	0.800348	0.797644	1.43357	1.11517	0.704823	1.04458	10	s. d. Relation Axis	1.08637	0.882248	0.972452	1.46383	0.90043	0.705548	1.10023	1.21642	0.926939	0.657941	0.675373	0.970278	10	s. d. Relation Axis	0.600496	0.854911	0.782474	0.788293	0.737683	0.669989	0.808676	0.733692	0.802189	0.624602	0.84985	0.509123	0.564417	0.462278
		11	Average Convex Hull	0.9384	0.93707	0.948896	0.937794	0.93463	0.919393	0.925369	0.929758	0.945385	0.949952	0.919615	0.951847	0.947371	0.910946	0.93663	0.935796	11	Average Convex Hull	0.919317	0.910361	0.913265	0.92184	0.922258	0.91736	0.915402	0.917402	0.931728	0.936116	0.897885	0.938786	11	Average Convex Hull	0.946158	0.921478	0.930134	0.946547	0.9239	0.947641	0.940181	0.938395	0.935507	0.941457	0.94624	0.931562	0.933447	0.938355
		12	s. d. Convex Hull	0.0214453	0.02451	0.0285947	0.0366247	0.0341286	0.0382803	0.0327813	0.0298532	0.0222441	0.0394861	0.0342458	0.0285954	0.0307713	0.0335184	0.0350847	0.0306767	12	s. d. Convex Hull	0.0321138	0.043542	0.041118	0.0403841	0.0355693	0.0289754	0.0331492	0.0408433	0.0280006	0.0330962	0.0412426	0.0475031	12	s. d. Convex Hull	0.0248235	0.0423447	0.0330301	0.0342899	0.0311978	0.027368	0.0352368	0.0358215	0.0411554	0.0291014	0.0296536	0.0283452	0.0315288	0.0268827
		13	Average Angles	7.98409	15.8069	-10.5299	-1.5949	1.20491	24.7264	-31.3899	-15.1788	-4.00084	-4.99655	-3.99145	12.4879	18.1397	-29.193	-5.81292	13.1234	13	Average Angles	11.8088	-16.8046	15.2956	-7.02019	-16.7391	20.9558	-10.7022	-13.231	5.63619	-0.993198	-16.6904	-16.2277	13	Average Angles	-10.2119	9.96894	-4.93195	-9.70791	17.749	5.90969	-22.0091	-9.12599	18.1107	-5.28475	21.8673	11.4626	11.2182	15.6947
		14	s. d. Angles	59.8341	43.6707	53.1146	49.6646	59.7047	41.7009	51.869	50.4432	61.5783	50.9121	46.1189	53.2527	47.3485	57.3357	59.9424	49.3848	14	s. d. Angles	65.1392	44.9525	60.8105	70.179	67.9943	55.6732	56.693	48.5431	71.2586	68.3348	59.8252	50.7724	14	s. d. Angles	46.2463	53.455	54.1571	46.0042	59.1209	53.1043	55.5933	61.8395	46.4994	69.484	50.0471	58.7394	48.9434	47.356
		15	Average Relation A1/A2	1.27792	1.28874	1.31669	1.29264	1.216	1.47315	1.22232	1.20291	1.16972	1.30433	3.35096	1.26422	1.21255	1.21438	1.19388	1.29067	15	Average Relation A1/A2	1.27776	1.28346	1.24797	1.17538	1.23027	1.21961	1.21629	1.26149	1.15083	1.19819	1.22217	1.37231	15	Average Relation A1/A2	1.23775	1.17741	1.31671	1.30651	1.50543	1.38466	1.29406	1.29416	1.2576	1.53703	1.3024	1.67563	1.66689	1.74347
		16	s. d. Relation A1/A2	0.261381	0.269088	0.331175	0.464062	0.333598	0.469957	0.359983	0.162529	0.116656	0.56376	35.9713	0.255209	0.181524	0.281275	0.208536	0.285064	16	s. d. Relation A1/A2	0.375452	0.33459	0.443846	0.140934	0.303968	0.185143	0.299432	0.276674	0.108655	0.284463	0.224593	0.554037	16	s. d. Relation A1/A2	0.217091	0.183043	0.615702	0.292904	0.574047	0.439073	0.437182	0.380259	0.397128	0.429766	0.525954	1.11757	0.741459	0.777439
		17	Average Neighbours	6.12215	6.12058	6.08232	6.11712	6.12632	6.05263	6.09091	6.06391	6.0687	6.06736	6.12092	6.09544	6.12033	6.08974	6.0915	6.11966	17	Average Neighbours	6.14063	6.16054	6.19398	6.06355	6.15228	6.12389	6.09593	6.08027	6.07267	6.07619	6.16404	6.12658	17	Average Neighbours	6.24265	6.08904	6.19158	6.11692	6.22998	6.25856	6.1	6.15869	6.15566	6.22131	6.21656	6.32677	6.32458	6.33742
		18	s. d. Neighbours	0.814537	0.859998	0.799039	1.07327	1.16603	0.80827	0.957239	0.906816	0.746178	1.09002	1.09623	0.8963	0.916311	1.00879	1.07213	1.33723	18	s. d. Neighbours	1.21179	1.21552	1.21339	1.14075	1.03571	0.99525	1.07697	1.10532	0.973682	0.820727	1.12486	1.01413	18	s. d. Neighbours	0.974665	0.955514	0.953687	1.10213	0.864131	0.929842	0.992246	1.17099	1.04251	1.09662	0.925258	1.0723	1.14629	1.07569
		19	s. d. Neighbours of slow cells	0.795874	0.818673	0.787382	1.09055	1.05637	0.787749	0.884664	0.886802	0.709653	1.13874	1.10933	0.894696	0.923394	1.00346	1.26051	1.02496	19	s. d. Neighbours of slow cells	1.11201	1.2172	1.28955	1.2283	1.16464	0.905691	1.03462	1.06446	0.818793	0.832691	0.967931	0.720624	19	s. d. Neighbours of slow cells	1.00135	0.99687	0.960627	0.983832	0.82545	0.845388	0.920307	0.989007	1.06388	0.983399	0.986891	0.900679	0.932347	0.998371
		20	s. d. Neighbours of fast cells	0.800341	0.943193	0.768424	1.01492	1.19058	0.870274	0.986476	0.847177	0.737804	0.794123	1.08164	0.880429	0.811919	0.927225	0.971157	1.38142	20	s. d. Neighbours of fast cells	1.21196	1.20845	1.1867	1.08807	0.928062	1.01204	1.08822	1.17452	1.00971	0.759828	1.17939	1.22204	20	s. d. Neighbours of fast cells	0.88549	0.904411	0.94857	1.20212	0.878369	0.97746	1.02562	1.28616	0.971765	1.09217	0.855998	1.15588	1.25888	1.09726
		21	slow Neighbours of slow cells	4.25281	4.49864	4.44033	3.63374	4.54264	4.71233	2.58475	2.28125	4.71717	4.62821	3.15909	4.28655	5.13846	2.49074	1.48889	2.06481	21	slow Neighbours of slow cells	0.258065	1.52273	2.2043	2.39604	2.28992	1.50794	1.42188	1.79208	1.33803	1.3	1.53672	3.23958	21	slow Neighbours of slow cells	2.35728	2.28346	2.53191	2.6	1.49842	3.3032	2.71939	2.88837	2.54884	2.93786	2.15868	2.71571	2.77356	2.87089
		22	fast Neighbours of slow cells	1.76685	1.54496	1.74074	2.43621	1.85271	1.43151	3.30508	3.5	1.47475	1.36538	2.9375	1.88304	1.03077	3.26852	4.35556	3.50926	22	fast Neighbours of slow cells	5.3871	4.44318	4.13978	3.9505	4.07983	4.44444	4.67188	4.46535	4.42254	4.42857	4.54237	2.59375	22	fast Neighbours of slow cells	4.29126	3.6378	3.68322	3.425	4.75079	3.01947	3.18367	3	3.3907	3.6466	3.88623	3.33714	3.27173	3.21924
		23	slow Neighbours of fast cells	5.13386	5.10526	4.77647	4.112	3.80328	4.55738	2.91111	3.07971	4.59375	5.27027	3.69231	4.48571	4.71429	3.07937	1.99074	2.30159	23	slow Neighbours of fast cells	0.501416	1.84834	2.17062	2.24171	2.3584	1.13043	1.04286	1.85782	1.65	2.01429	1.7593	3.79032	23	slow Neighbours of fast cells	2.31435	2.84848	2.96964	3.16364	1.75729	3.02567	3.50575	3.45604	3.38028	3.11664	2.8714	3.15353	3.0067	3.13616
		24	fast Neighbours of fast cells	1.27559	1.26316	1.02353	2.112	1.7541	1.11475	3.35556	3.24638	1.09375	1.10811	2.46154	1.42857	1.2	3.29365	4.2037	4.11111	24	fast Neighbours of fast cells	5.68272	4.39336	3.97156	3.71564	3.66416	5.03261	5.05357	4.18009	4.51429	4.23571	4.43764	2.79032	24	fast Neighbours of fast cells	3.70781	3.3697	3.20304	3.04242	4.46558	3.16803	2.81609	3.02198	3	2.78388	3.47228	3.43845	3.57254	3.46094
		25	Average Relation Neighbours Area	0.843639	0.833102	0.829138	0.77361	0.756116	0.850077	0.807773	0.810236	0.820419	0.78367	0.799135	0.789751	0.768565	0.762057	0.771033	0.756755	25	Average Relation Neighbours Area	0.791041	0.735642	0.736978	0.713845	0.779272	0.817247	0.797861	0.713034	0.797585	0.805549	0.740245	0.818281	25	Average Relation Neighbours Area	0.779245	0.760228	0.795399	0.78411	0.82038	0.784567	0.823938	0.799814	0.802459	0.740434	0.812288	0.739217	0.756716	0.757129
		26	s. d. Relation Neighbours Area	0.175823	0.197436	0.194577	0.247917	0.261137	0.167891	0.207339	0.193577	0.22654	0.269666	0.229294	0.237797	0.259919	0.266788	0.259843	0.28173	26	s. d. Relation Neighbours Area	0.259021	0.287349	0.323925	0.325135	0.237913	0.223003	0.27268	0.326504	0.250984	0.211532	0.344124	0.182792	26	s. d. Relation Neighbours Area	0.238293	0.269963	0.251693	0.257707	0.20964	0.226861	0.201059	0.28171	0.27777	0.303033	0.215058	0.270226	0.315891	0.255354
		27	Average Relation Neighbours major axis	0.889464	0.877694	0.889356	0.8425	0.808636	0.866865	0.831292	0.842398	0.873228	0.846328	0.853546	0.861329	0.857774	0.82072	0.838924	0.811038	27	Average Relation Neighbours major axis	0.827609	0.801498	0.78063	0.807981	0.835859	0.862386	0.847814	0.80551	0.856848	0.870664	0.822228	0.856134	27	Average Relation Neighbours major axis	0.853614	0.836476	0.860543	0.844963	0.86804	0.861856	0.853652	0.844722	0.837365	0.825026	0.867017	0.827806	0.834296	0.835385
		28	s. d. Relation Neighbours major axis	0.118257	0.144664	0.12759	0.173742	0.291983	0.143142	0.203046	0.181539	0.13456	0.197364	0.161986	0.15698	0.16161	0.203847	0.185701	0.212941	28	s. d. Relation Neighbours major axis	0.198014	0.215144	0.297761	0.224425	0.195758	0.187565	0.214217	0.215328	0.177822	0.142495	0.207346	0.157713	28	s. d. Relation Neighbours major axis	0.154221	0.185691	0.172082	0.190401	0.145055	0.143561	0.165156	0.204317	0.222098	0.205815	0.156683	0.183863	0.187912	0.170388
		29	Average Relation Neighbours minor axis	0.892433	0.886165	0.879907	0.837393	0.8275	0.888593	0.8666	0.868642	0.876887	0.850441	0.850362	0.850852	0.833191	0.83514	0.843349	0.831125	29	Average Relation Neighbours minor axis	0.838537	0.814435	0.821294	0.793102	0.838136	0.876573	0.855051	0.796355	0.858574	0.864944	0.814884	0.868102	29	Average Relation Neighbours minor axis	0.847533	0.826086	0.865969	0.844682	0.871801	0.85215	0.87457	0.853705	0.868833	0.826895	0.868027	0.837372	0.836689	0.842388
		30	s. d. Relation Neighbours minor axis	0.122106	0.131553	0.132287	0.175509	0.200022	0.12628	0.149535	0.131439	0.164211	0.178116	0.175645	0.168421	0.181634	0.174397	0.20058	0.21018	30	s. d. Relation Neighbours minor axis	0.193946	0.207944	0.212628	0.23147	0.171405	0.133471	0.17226	0.223534	0.157487	0.148366	0.210214	0.146294	30	s. d. Relation Neighbours minor axis	0.165419	0.202183	0.152442	0.191754	0.145237	0.162406	0.145744	0.183884	0.150943	0.185326	0.150662	0.165482	0.181406	0.168056
		31	Average Relation Neighbours relation axis	0.998623	0.999887	1.00371	1.01119	1.0113	1.00355	1.00127	1.00233	0.990546	0.999847	1.00459	1.00562	1.01762	1.00715	0.995022	1.00532	31	Average Relation Neighbours relation axis	1.00324	1.00114	1.00145	1.01614	1.00249	1.00333	0.999015	0.997695	1.00584	1.00662	1.00753	1.00001	31	Average Relation Neighbours relation axis	1.0056	1.0081	1.00253	1.00752	0.999042	1.0043	1.00052	1.00732	0.998875	1.00293	1.0012	1.00258	1.00492	1.0026
		32	s. d. Relation Neighbours relation axis	0.165109	0.176798	0.167759	0.256853	0.34004	0.228256	0.318841	0.289593	0.225048	0.199137	0.255058	0.1995	0.224639	0.238276	0.191739	0.24795	32	s. d. Relation Neighbours relation axis	0.249188	0.285187	0.536022	0.336407	0.285895	0.235972	0.225365	0.274904	0.228933	0.21891	0.261917	0.243097	32	s. d. Relation Neighbours relation axis	0.218715	0.251888	0.199155	0.200161	0.204322	0.212966	0.233386	0.230013	0.240589	0.201363	0.2071	0.202214	0.210918	0.21497
		33	Average Relation Neighbours convex hull	0.981388	0.97975	0.981999	0.971157	0.962926	0.981861	0.971207	0.970976	0.978316	0.975127	0.973658	0.977057	0.9788	0.973746	0.972973	0.975246	33	Average Relation Neighbours convex hull	0.977594	0.970409	0.948792	0.968045	0.970368	0.970676	0.966442	0.970671	0.971595	0.978015	0.965806	0.96537	33	Average Relation Neighbours convex hull	0.980008	0.968736	0.973305	0.983405	0.975769	0.97806	0.973563	0.971566	0.970371	0.980678	0.977007	0.973692	0.975114	0.976325
		34	s. d. Relation Neighbours convex hull	0.0226674	0.0277818	0.0214957	0.0349018	0.084455	0.0225537	0.0344623	0.0364515	0.0264915	0.0355212	0.0345218	0.0300847	0.0270433	0.0326283	0.0330289	0.0305378	34	s. d. Relation Neighbours convex hull	0.0301906	0.037623	0.107074	0.0413087	0.0361827	0.0363258	0.0458054	0.0387932	0.0398629	0.0279926	0.0411456	0.045051	34	s. d. Relation Neighbours convex hull	0.0250626	0.0376742	0.0329137	0.0231016	0.0306632	0.0290874	0.0341384	0.0384668	0.0384734	0.0268379	0.0320432	0.0323209	0.0305415	0.0285888
		35	Average Relation Neighbours angles	1.06241	0.248434	3.52444	-0.350802	-17.3482	0.379166	0.144735	0.371212	-0.0141394	-0.215757	-0.561783	0.0190544	-0.0685873	0.220959	0.741677	0.511674	35	Average Relation Neighbours angles	0.151592	2.10124	0.520651	0.334447	0.481666	0.138718	0.592261	-0.296137	0.590409	-0.431576	-0.118086	1.96637	35	Average Relation Neighbours angles	0.259551	0.203487	-1.78983	0.107063	0.187674	-0.251556	0.151063	0.356938	0.65386	-1.10396	0.171498	0.500075	-0.355693	0.303814
		36	s. d. Relation Neighbours angles	11.3835	3.05995	73.516	7.92406	244.714	1.71981	17.2206	13.587	2.16501	4.62973	8.2935	6.43699	3.60542	2.72345	8.67822	1.7243	36	s. d. Relation Neighbours angles	4.87792	18.7475	3.03837	4.02447	37.812	3.56412	8.40016	8.41123	12.6377	3.46722	9.04684	21.4584	36	s. d. Relation Neighbours angles	20.0867	1.6465	40.9056	9.24879	5.06097	12.0438	13.3026	30.0206	3.0563	26.8018	4.69427	14.2139	14.4608	12.2054
		37	Average Relation Neighbours relation A1/A2	0.943251	0.941108	0.946496	0.93561	0.930147	0.94761	0.963517	0.961775	0.969652	0.927001	0.884374	0.949549	0.95494	0.944415	0.951597	0.952512	37	Average Relation Neighbours relation A1/A2	0.940689	0.93745	0.925649	0.957128	0.908939	0.948297	0.913144	0.946191	0.946257	0.950434	0.940021	0.875141	37	Average Relation Neighbours relation A1/A2	0.908397	0.95496	0.916163	0.953998	0.901421	0.898067	0.921275	0.91395	0.938656	0.891578	0.934188	0.859697	0.862731	0.845817
		38	s. d. Relation Neighbours relation A1/A2	0.0754403	0.0939444	0.0950719	0.181122	0.255285	0.0615962	0.0490728	0.0540314	0.112916	0.124321	0.234308	0.0950494	0.0920284	0.129344	0.132382	0.202811	38	s. d. Relation Neighbours relation A1/A2	0.169923	0.221961	0.271759	0.108072	0.145663	0.0685595	0.143531	0.121127	0.0886141	0.0729145	0.0925413	0.158815	38	s. d. Relation Neighbours relation A1/A2	0.114904	0.15594	0.115984	0.183343	0.145195	0.154704	0.27187	0.200483	0.144587	0.168291	0.0937419	0.178095	0.181349	0.194286
		39	Average Strengths	753.632	756.199	929.597	1570.4	1290.61	2174.48	1098.21	1479.56	1484.33	1898.36	1267.21	1090.77	1897.34	1221.86	1376.95	2165.55	39	Average Strengths	879.872	1022.07	1931.16	2572.7	1537.68	942.521	1614.63	3160.1	2376.09	1153.64	771.065	1342.84	39	Average Strengths	439.466	984.046	536.969	919.717	553.929	780.197	884.975	1490.14	1819.37	1217.73	826.573	890.55	887.453	1206.23
		40	s. d. Strengths	150.105	165.276	181.518	457.211	442.217	674.814	267.473	576.093	261.096	759.368	578.557	235.352	525.694	370.887	348.854	558.618	40	s. d. Strengths	259.504	307.817	851.295	1044.21	1341.92	244.037	458.852	1059.41	556.772	241.857	385.037	364.176	40	s. d. Strengths	120.09	231.017	141.529	222.988	255.744	270.774	214.412	449.866	702.678	734.152	565.949	509.346	552.343	563.466
		41	Average Strengths of fast cells	817.286	818.218	855.259	1619.09	1102	1997.49	1150.22	1564.51	1321.45	1935.87	1233.5	1039.87	1728.85	1330.73	1429.9	2210.92	41	Average Strengths of fast cells	891.739	1041.6	1794.18	2504.33	1465.96	950.99	1621.33	3010.07	2382.61	1199.72	781.159	1525.69	41	Average Strengths of fast cells	408.779	1016.05	528.52	940.83	554.303	811.107	928.707	1549.88	1875.04	1164.27	849.612	948.918	963.31	1228.39
		42	s. d. Strengths of fast cells	149.863	182.867	180.615	449.789	477.403	750.73	286.395	599.041	267.852	769.985	552.645	230.22	521.576	380.089	326.366	588.001	42	s. d. Strengths of fast cells	260.876	295.066	826.001	1101.11	1315.3	253.448	466.773	883.557	586.775	235.34	391.687	454.805	42	s. d. Strengths of fast cells	102.821	221.343	144.583	251.269	261.086	268.801	226.715	485.801	689.573	722.878	586.687	522.384	584.517	583.767
		43	Average Strengths of slow cells	730.924	736.934	955.6	1544.43	1379.8	2210.09	1038.71	1387.97	1536.98	1889.46	1292.1	1111.6	1929.41	1094.84	1249.89	2058.52	43	Average Strengths of slow cells	744.744	975.255	2026.72	2601.48	1657.93	905.419	1585.34	3376.78	2252.26	1061.47	745.002	1224.75	43	Average Strengths of slow cells	495.954	942.461	547.496	897.945	552.919	767.166	846.152	1439.57	1760.14	1278.25	795.463	830.264	804.261	1145.89
		44	s. d. Strengths of slow cells	143.715	154.692	174.866	451.344	396.164	640.527	231.214	537.69	237.22	759.061	597.312	234.912	521.296	317.059	371.48	532.715	44	s. d. Strengths of slow cells	201.7	333.549	830.305	802.324	1379.84	195.018	424.676	1246.46	486.723	229.522	367.103	224.606	44	s. d. Strengths of slow cells	128.874	237.494	137.072	187.783	241.104	258.376	195.377	411.439	708.38	742.775	535.973	488.617	502.085	540.597
		45	Average Clustering Coefficient	30.8848	30.0249	43.5118	38.2844	65.2052	52.6073	56.2496	52.0807	78.1637	60.4458	55.4643	46.8727	40.8245	71.1547	64.8101	55.2639	45	Average Clustering Coefficient	43.2258	51.8118	43.4277	43.3548	38.4372	51.9151	39.4077	42.7196	39.1122	45.1962	38.5715	52.4733	45	Average Clustering Coefficient	18.2064	45.5733	32.3615	44.7489	29.3504	25.4481	44.8774	37.9216	34.5419	26.4055	32.4781	22.2694	19.7192	18.0071
		46	s. d. Clustering Coefficient	31.2362	31.8429	40.7537	35.3363	61.1001	47.2937	48.6489	42.4218	72.3352	55.4001	43.8454	48.8628	40.2008	61.0098	63.7684	44.6229	46	s. d. Clustering Coefficient	40.4904	45.3631	34.5171	32.3147	26.0665	42.3078	31.7931	28.5895	29.9439	50.2427	34.5308	61.2491	46	s. d. Clustering Coefficient	16.8409	43.8546	30.3994	40.5034	24.4356	21.4957	36.3913	29	26.393	17.9508	21.5086	15.2258	13.3416	12.4843
		47	Average Clustering Coefficient of fast cells	46.9516	46.8672	61.4961	41.4148	87.5738	60.8512	67.0817	49.9695	93.9486	63.5216	59.3426	71.9188	51.9579	71.241	84.3037	53.3691	47	Average Clustering Coefficient of fast cells	55.881	65.2096	47.2669	45.5917	44.0306	58.7375	40.8805	46.8452	40.6733	71.5777	42.7029	81.4127	47	Average Clustering Coefficient of fast cells	28.5863	61.5205	33.9684	60.182	30.695	20.0685	54.7572	37.8138	35.0386	24.9235	35.1688	20.5375	17.6851	13.9287
		48	s. d. Clustering Coefficient of fast cells	7.61237	9.16112	11.0022	14.41	24.0393	22.6288	14.321	13.3636	17.2653	15.0365	17.0127	15.7709	16.9091	17.2794	19.6409	16.5936	48	s. d. Clustering Coefficient of fast cells	13.5983	17.1738	14.3502	11.741	9.27504	12.7697	13.8711	9.47299	11.1685	13.3849	10.4563	25.7889	48	s. d. Clustering Coefficient of fast cells	5.93061	13.0171	7.1233	15.1654	6.48036	7.82572	13.5374	12.6206	10.1073	7.6675	8.05236	7.01668	7.86184	4.41654
		49	Average Clustering Coefficient of slow cells	48.8195	49.2925	58.6995	40.1965	76.4677	54.1195	72.3729	54.4119	91.169	65.5352	56.7957	68.4592	48.2057	82.3481	91.6872	58.4086	49	Average Clustering Coefficient of slow cells	63.2454	66.957	47.4684	46.7153	43.3235	63.2393	38.5303	44.8328	40.5517	75.1293	43.9859	86.7711	49	Average Clustering Coefficient of slow cells	27.2477	65.1312	35.073	60.4312	30.0798	20.7803	58.4508	37.8446	35.7538	23.2403	37.0905	21.6336	18.1565	13.9842
		50	s. d. Clustering Coefficient of slow cells	9.85773	9.70633	11.1962	12.9609	18.1862	15.0505	17.1547	18.9896	18.1732	19.5034	16.2241	14.084	15.7907	21.4035	23.1026	18.8901	50	s. d. Clustering Coefficient of slow cells	16.7274	16.2451	18.388	14.4355	9.75468	13.836	9.70394	9.89333	10.8954	18.3505	12.3941	21.982	50	s. d. Clustering Coefficient of slow cells	5.5939	15.7374	7.84162	13.8927	5.55643	7.66258	13.2652	11.628	10.9518	6.52269	9.31482	7.55471	6.70738	4.80888
		51	Average Eccentricity	2776.49	2759.29	2864.03	2047.59	2862.77	2085.25	2893.38	2816.75	2980.7	2458.32	3329.31	2891.14	2098.46	3093.29	2913.05	2067.47	51	Average Eccentricity	2795.43	2855.99	2183.96	2142.07	2872.59	2866.76	2171.64	2137.88	2026.58	2889.97	3308.66	2844.58	51	Average Eccentricity	2657.18	2828.42	2727.19	2773.21	3140.91	2951.07	2864.72	2032.23	2184.01	2644.62	3307.28	3052.3	3370.7	3227.16
		52	s. d. Eccentricity	366.705	366.675	372.817	336.995	382.759	343.473	374.279	489.73	388.04	367.743	637.14	369.13	335.967	417.018	385.679	296.738	52	s. d. Eccentricity	368.983	360.462	282	350.794	508.303	367.843	341.21	353.693	269.393	379.617	567.462	382.709	52	s. d. Eccentricity	350.63	366.589	351.709	371.122	499.558	589.694	363.519	337.411	360.005	479.526	649.367	613.094	629.286	588.888
		53	Average Eccentricity of fast cells	2781.93	2745.85	2851.72	2045.94	2837.57	2113.33	2909.48	2804.96	2981.87	2484.35	3316.65	2867.83	2085.46	3133.04	2960.56	2079.84	53	Average Eccentricity of fast cells	2796.26	2841.42	2301.47	2206.1	2862.87	2874.92	2171.65	2194.26	2103.78	2876.07	3311.82	2881.12	53	Average Eccentricity of fast cells	2666.87	2829.96	2733.83	2735.33	3148.15	3068.92	2864.1	2027.35	2176.05	2643.31	3331.63	3032.97	3333.35	3277.71
		54	s. d. Eccentricity of fast cells	367.811	355.662	366.758	330.536	409.595	325.989	394.613	483.19	441.356	354.154	610.912	349.649	287.764	434.661	382.122	313.895	54	s. d. Eccentricity of fast cells	371.53	366.697	330.881	360.416	508.333	352.276	341.102	357.496	285.84	367.005	576.991	345.239	54	s. d. Eccentricity of fast cells	352.767	370.1	344.155	374.217	501.376	534.252	349.203	334.277	367.983	478.613	653.834	609.153	616.461	635.77
		55	Average Eccentricity of slow cells	2774.56	2763.46	2868.33	2084.78	2874.68	2087.53	2874.96	2829.46	2980.33	2452.15	3338.65	2900.68	2102.01	3046.92	2799.05	2089.13	55	Average Eccentricity of slow cells	2786.01	2890.92	2174.74	2188.89	2888.89	2830.99	2171.62	2250.85	2012.86	2917.76	3300.51	2820.98	55	Average Eccentricity of slow cells	2639.35	2826.41	2718.92	2812.28	3121.34	2960.39	2865.27	2036.36	2196.55	2646.11	3274.41	3072.27	3411.68	3239.82
		56	s. d. Eccentricity of slow cells	366.809	370.405	375.567	330.377	370.455	339.596	350.336	498.27	371.649	371.734	657.412	377.395	341.48	392.358	374.084	255.565	56	s. d. Eccentricity of slow cells	344.167	344.578	286.528	350.595	508.905	430.832	344.381	373.788	278.475	404.958	543.593	405.078	56	s. d. Eccentricity of slow cells	346.295	363.428	361.138	364.955	494.866	594.856	376.664	340.765	350.704	481.02	642.798	616.937	640.934	569.209
		57	Average Betweenness Centrality	7900.93	7647.75	4661.23	3930.12	2300.8	1865.02	3366.75	4734.59	1529.56	2136.7	6882.21	3086.32	2552.9	3143.29	1861.78	2136.76	57	Average Betweenness Centrality	5785.92	4158.78	3372.64	3215.44	16312.7	4948.99	4001.23	3044.19	3877.81	2661.96	15652.4	1900	57	Average Betweenness Centrality	34034.2	4081.86	19380.3	4532.84	34145.9	35839.1	5830.15	4890.27	6641.7	29724.7	28323.7	53858.1	66607.4	64886.9
		58	s. d. Betweenness Centrality	4394.71	4398.6	2442.15	4118.44	1226.19	1644.6	1844.85	4128.22	678.072	1097.52	5098.22	1614.82	2365.45	1771.9	1002.51	2123.57	58	s. d. Betweenness Centrality	3473.54	2607.66	4014.67	4758.87	15356.2	2709.51	4297.44	5036.95	4999.75	1308.53	9897.16	910.402	58	s. d. Betweenness Centrality	24088.8	2284.72	12420.5	2592.84	24598.4	52103.5	3518.95	6897.29	10005.9	72532.7	28602.4	127068	214422	240734
		59	Average Betweenness Centrality of fast cells	8269.97	8116.12	4319.76	4248.48	2092.36	1641.31	3585.24	5036.49	1340.5	2142.27	7545.34	2966	2556.4	3238.78	1875.59	1874.52	59	Average Betweenness Centrality of fast cells	5797.59	4413	3214.1	3287.18	15764.9	4925.81	3926.5	2664.82	3956.52	2782.76	15601.2	2049.71	59	Average Betweenness Centrality of fast cells	32011.1	4156.58	19322.2	4692.18	34634.9	37278.7	6334.53	5220.33	6679.7	26571.3	30701.3	60360.9	72455.7	65035.9
		60	s. d. Betweenness Centrality of fast cells	4864.05	4678.81	2108.07	4599.48	1329.29	1381.59	2073.93	4352.31	695.749	886.36	5804.1	1589.17	2521.82	1902.83	961.297	1781.52	60	s. d. Betweenness Centrality of fast cells	3504.76	2735.07	4159.35	4995.95	14886.2	2668.73	4152.7	4448.21	5127.12	1233.53	10146.3	990.165	60	s. d. Betweenness Centrality of fast cells	22510.1	2250.05	12181.4	2597.26	24528.3	55170.3	3855.77	6965.26	10096.2	66969.1	31721	141960	246068	247508
		61	Average Betweenness Centrality of slow cells	7769.28	7502.26	4780.67	3665.52	2399.36	1924.21	3116.78	4409.11	1590.67	2135.38	6392.4	3135.58	2518.79	3031.89	1828.62	2368.48	61	Average Betweenness Centrality of slow cells	5653.03	3549.2	3235.2	2899.5	17231.2	5050.54	4328.19	3476.73	3584.7	2420.37	15784.5	1803.31	61	Average Betweenness Centrality of slow cells	37758.2	3984.79	19452.8	4368.52	32824	34048.6	5382.39	4610.87	6616.38	33294.5	25113.3	47141.6	60193.6	61551.8
		62	s. d. Betweenness Centrality of slow cells	4214.2	4304.15	2541.88	3771.51	1166.74	1686.99	1512.05	3862.72	664.341	1144.38	4460.9	1627.25	2338.78	1607.38	1105.94	2513.16	62	s. d. Betweenness Centrality of slow cells	3145.02	2168.47	3771.38	3902.08	16103.7	2901.68	4903.52	6021.36	4561.55	1425.6	9249.12	846.251	62	s. d. Betweenness Centrality of slow cells	26372.3	2334.35	12726.4	2586.1	24777.3	48912.1	3132.78	6843.01	9862.76	78268.8	23416.6	109281	173120	224811
		63	Average Shortest Paths lengths	1328.62	1328.58	1362.28	887.462	1379.36	908.138	1369.91	969.351	1389.87	1024.13	1157.87	1361.17	875.233	1386.26	1374.7	843.964	63	Average Shortest Paths lengths	1318.12	1374.58	805.66	783.422	1131.12	1336.99	866.756	738.611	680.052	1342.51	1216.06	1355.36	63	Average Shortest Paths lengths	1295.99	1372.4	1317.76	1344.51	1209.75	804.519	1375.48	868.444	839.226	869.787	1165.93	904.247	824.296	736.844
		64	s. d. Shortest Paths Lengths	626.037	625.943	639.932	524.717	645.056	508.407	639.814	516.026	645.384	519.863	569.413	636.842	490.623	659.809	642.089	455.4	64	s. d. Shortest Paths Lengths	624.524	642.187	445.188	449.823	583.237	630.344	509.165	425.268	382.848	631.753	580.577	636.134	64	s. d. Shortest Paths Lengths	613.969	641.591	622.659	630.887	580.695	511.643	643.709	517.631	500.349	541.088	575.475	518.957	513.703	485.475
		65	Average Shortest Paths Lengths from fast cells to fast cells	1338.39	1323.4	1348.41	883.086	1364.39	889.359	1400.34	963.714	1411.87	1048.7	1122.35	1335.45	782.199	1447.41	1432.13	870.461	65	Average Shortest Paths Lengths from fast cells to fast cells	1321.61	1355.79	931.823	782.5	1115.83	1347.58	865.609	748.369	670.993	1312.76	1235.05	1382.83	65	Average Shortest Paths Lengths from fast cells to fast cells	1306.61	1375.98	1322.6	1300.86	1208.65	718.629	1369.11	864.102	832.509	872.248	1174.43	896.422	809.314	790.39
		66	s. d. Shortest Paths Lengths from fast cells to fast cells	622.346	612.417	624.465	519.449	641.109	520.228	654.829	509.502	645.172	494.073	544.468	612.564	438.263	686.937	661.382	470.451	66	s. d. Shortest Paths Lengths from fast cells to fast cells	625.691	634.961	534.664	451.727	573.753	634.907	508.353	431.746	395.386	617.662	589.94	639.249	66	s. d. Shortest Paths Lengths from fast cells to fast cells	619.789	641.851	623.58	614.256	579.665	476.108	637.836	512.65	491.772	542.486	576.396	520.742	507.869	524.127
		67	Average Shortest Paths Lengths from fast cells to slow cells	1240.1	1238.5	1275.94	801.164	1273.53	769.611	1469.4	1022.58	1310.18	945.461	1089.81	1274.42	727.642	1477.12	1778.75	1117.29	67	Average Shortest Paths Lengths from fast cells to slow cells	1960.88	1826.48	1040.01	1080.83	1315.04	1999.76	1456.33	1155.99	990.002	1604.2	1527.48	1293.99	67	Average Shortest Paths Lengths from fast cells to slow cells	1575.05	1542.8	1422.97	1372.76	1523.73	738.064	1321.9	790.942	810.965	959.024	1237.82	954.245	949.652	774.399
		68	s. d. Shortest Paths Lengths from fast cells to slowcells	609.333	600.038	622.718	521.481	643.445	447.688	596.196	513.982	621.808	458.979	581.024	633.472	400.826	619.316	523.936	446.643	68	s. d. Shortest Paths Lengths from fast cells to slowcells	576.405	593.328	406.486	403.993	561.671	565.155	448.415	351.754	347.185	592.906	511.371	631.197	68	s. d. Shortest Paths Lengths from fast cells to slowcells	526.132	621.168	585.399	630.661	529.808	508.273	661.004	521.396	491.456	524.192	549.126	511.156	500.943	480.656
		69	Average Shortest Paths Lengths from slow cells to slow cells	1327.96	1331.84	1369.32	912.522	1392.25	906.75	1339.83	979.298	1380.65	1020.67	1187.74	1375.7	879.146	1320.21	1241.93	812.565	69	Average Shortest Paths Lengths from slow cells to slow cells	1288.22	1421.26	804.804	805.107	1158.29	1260.44	872.691	738.875	671.934	1400.12	1163.02	1334.75	69	Average Shortest Paths Lengths from slow cells to slow cells	1277.39	1372.36	1314.14	1391.95	1213.51	813.399	1383.28	874.951	847.499	868.12	1154.86	911.73	837.534	713.078
		70	s. d. Shortest Paths Lengths from slow cells to slow cells	625.822	629.214	642.981	545.312	647.666	506.94	619.41	520.58	638.695	523.593	584.215	643.453	493.839	620.488	588.107	457.485	70	s. d. Shortest Paths Lengths from slow cells to slow cells	629.63	652.641	435.619	458.665	599.074	615.083	518.575	436.087	381.815	652.789	553.593	636.519	70	s. d. Shortest Paths Lengths from slow cells to slow cells	602.578	641.329	620.404	645.876	581.949	515.847	645.315	521.265	507.683	539.302	572.238	516.332	518.056	470.427
		71	Average Shortest Paths Lengths from slow cells to fast cells	1728.05	1788.13	1721.2	1177.8	1669.58	1405.49	1279.6	913.558	1859.1	1638.11	1247.91	1629.06	1370.04	1297.76	1215.43	670.736	71	Average Shortest Paths Lengths from slow cells to fast cells	1269.19	1270.39	854.392	700.037	1058.15	1235	792.369	616.101	652.156	1273.16	1122.86	1490.34	71	Average Shortest Paths Lengths from slow cells to fast cells	1185.06	1258.72	1243.16	1311.84	1139.07	810.204	1433.89	963.196	859.53	796.105	1119.3	856.678	722.118	737.671
		72	s. d. Shortest Paths Lengths from slow cells to fast cells	543.555	529.881	577.19	464.728	538.317	398.53	659.51	516.066	630.952	489.159	529.278	546.626	357.63	675.204	590.867	400.14	72	s. d. Shortest Paths Lengths from slow cells to fast cells	601.946	609.994	523.008	432.31	579.503	571.853	465.438	374.457	385.654	631.498	558.233	623.549	72	s. d. Shortest Paths Lengths from slow cells to fast cells	607.172	630.076	637.03	630.069	569.445	476.926	620.857	495.733	508.781	543.656	587.215	522.708	503.108	506.292
		73	Radius	1772.9	1746.62	1782.13	1260	1806.77	1278.11	1786.27	1331.59	1867.19	1408.15	1602.83	1774.26	1233.99	1992.33	1767.24	1150.11	73	Radius	1780.1	1751.84	1124.18	1163.54	1674.01	1817.4	1324.18	1072.5	945.419	1821.71	1632.19	1788.05	73	Radius	1741.07	1818.07	1738.04	1760.44	1568.97	1200.63	1819.66	1196.43	1212.78	1223.64	1578.27	1243.07	1177.76	1080.8
		74	Diameter	3427.11	3409.13	3468.14	2490.1	3375.45	2510.04	3557.67	2642.14	3553.01	2662.1	2676.85	3466.35	2353.31	3969.69	3532.19	2211.32	74	Diameter	3478.3	3408.34	2171.27	2233.17	2724.54	3541.25	2575.54	2055.3	1822.11	3480.14	2975.1	3392.19	74	Diameter	3416.46	3495.88	3388.09	3397.89	2895.08	2376.84	3544.79	2347.31	2379.96	2443.81	2712.27	2461.94	2344.21	2160.04
		75	Efficiency	0.00110426	0.00110634	0.00106887	0.00170364	0.00104101	0.00157848	0.00105393	0.00149037	0.00101104	0.00135635	0.0012584	0.00105883	0.00164416	0.00104563	0.00103498	0.00166678	75	Efficiency	0.00111106	0.0010602	0.00177796	0.00188014	0.00136402	0.00108847	0.00172849	0.00200732	0.00210223	0.0010687	0.00120601	0.00105185	75	Efficiency	0.00116401	0.00105924	0.00113822	0.00108269	0.0012383	0.00211194	0.00106495	0.00176718	0.00185043	0.0019169	0.00130284	0.0018348	0.0021061	0.00251595
		76	pearson correlation	0.0995406	0.122411	0.0628525	0.145398	0.0210226	0.159995	0.095417	0.322461	0.119599	0.325635	0.429656	0.043667	0.0743073	0.231789	0.171869	0.0714178	76	pearson correlation	0.108641	0.0214898	0.130086	0.355574	0.748652	0.0745468	0.0866973	0.213213	0.135899	0.0915593	0.43647	0.135086	76	pearson correlation	0.157087	0.122392	0.177594	0.0503351	0.567783	0.235624	0.12712	0.101926	0.360962	0.668396	0.71192	0.531566	0.466069	0.48072
		77	Algebraic connectivity	3.88488	4.01854	7.05448	13.102	16.484	34.3508	9.72164	13.5465	26.6132	26.4107	11.0582	11.6796	23.3383	8.35318	20.6526	32.3453	77	Algebraic connectivity	4.89729	7.75141	22.6728	25.9523	2.26302	6.54015	12.6424	40.0408	23.6056	12.4204	2.44271	21.1929	77	Algebraic connectivity	0.829307	8.94063	1.69321	7.5216	1.01758	1.76432	5.24441	9.94122	11.8786	1.81491	2.11239	1.38272	1.34701	2.14392
		78	S_metric	1511080000	1537120000	1494000000	5876220000	1573080000	5867570000	1587250000	3751370000	1328650000	4736730000	3283390000	1494450000	5632910000	1815420000	1434790000	6171050000	78	S_metric	1657160000	1748180000	6263020000	16313800000	26307800000	1596170000	6568450000	25591100000	10890000000	1428950000	2458180000	1454610000	78	S_metric	1756770000	1491130000	1629630000	1503380000	2458420000	6799550000	1566770000	7051240000	13437900000	20949700000	4994320000	12425100000	17893900000	32306300000
		79	Assortativity	0.128616	0.0958246	0.128049	0.21187	0.0525424	0.0801038	0.108791	0.343068	0.210386	0.387624	0.489086	0.0784769	0.0788522	0.100944	0.178585	0.0783784	79	Assortativity	0.047579	0.00554609	0.0587705	0.256149	0.7972	0.0867426	0.134754	0.239885	0.165418	0.130513	0.312506	0.159041	79	Assortativity	0.0291808	0.0993578	0.0329392	0.0349153	0.399462	0.288177	0.0664755	0.104116	0.42454	0.630084	0.713638	0.634477	0.624159	0.514562
		80	Density	0.00343866	0.00318217	0.00592589	0.0105971	0.0107397	0.0183604	0.00877715	0.00963033	0.014247	0.0151539	0.00946337	0.00650049	0.0118343	0.0108473	0.011092	0.0191816	80	Density	0.00555665	0.00754697	0.0136756	0.0193193	0.00800293	0.00787851	0.0129713	0.0229584	0.0170552	0.00642398	0.00356133	0.00769881	80	Density	0.00139247	0.00633236	0.00202554	0.00632279	0.00236345	0.00346207	0.00663328	0.012085	0.0125648	0.00564568	0.00484864	0.00393753	0.00346105	0.00435701
		81	Transitivity	47.0865	47.5177	58.2109	37.6863	76.3174	53.0294	67.535	48.8424	91.4725	60.0136	52.9544	67.7017	45.8289	74.0194	83.5513	51.9298	81	Transitivity	53.4749	61.8081	44.8075	43.7376	43.4475	57.3302	37.8	45.2928	38.5538	71.7131	44.1521	81.1508	81	Transitivity	27.2449	60.7318	39.6845	56.8657	32.2984	20.0175	54.2374	35.1179	32.1	24.9913	31.1467	21.2745	18.4467	16.0427
		82	Modularity	0.770472	0.779149	0.753952	0.63948	0.70527	0.605649	0.741412	0.677914	0.685092	0.621283	0.705076	0.724766	0.621797	0.740653	0.710769	0.608657	82	Modularity	0.764678	0.74945	0.634454	0.647893	0.690872	0.755499	0.651743	0.624815	0.651294	0.715525	0.76698	0.699896	82	Modularity	0.835445	0.744896	0.832848	0.743022	0.798864	0.770648	0.763415	0.654417	0.653189	0.764049	0.753621	0.782992	0.792414	0.799866
[truncated: 70 more columns]
